# Supplementary material
Source: PubMed Central journal article supplement (PMC4634090)

Supplementary Figure S1:

Representative FRET-FLIM data (left panels) is shown for RTNLB6 and RTNLB3, respectively, with each of the potential interaction partners. Confocal images for each combination are shown in the right panel with the RTNLB in green, the potential interacting protein in red and the merge in yellow.

RTNL6-GFP control  
2.63 ± 0.06

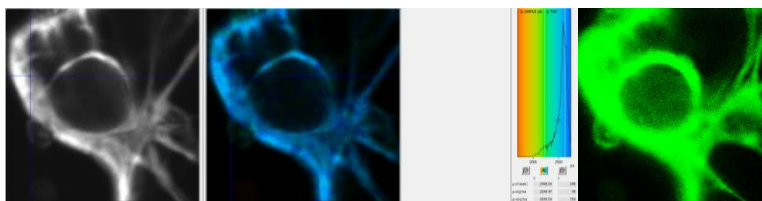

RTNLB6-GFP+RTNLB3-RFP  
2.37 ± 0.04

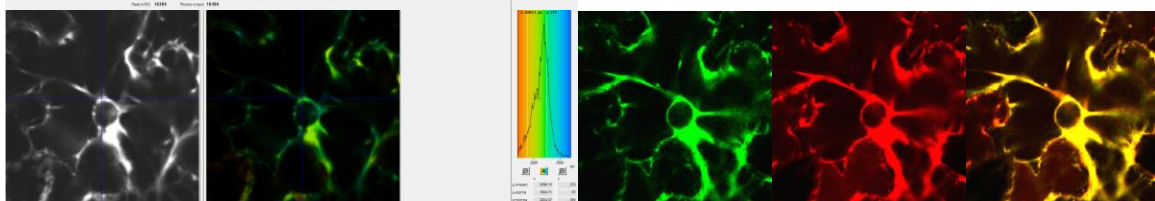

RTNLB6-GFP+SYTA-RFP  
2.46 ± 0.02

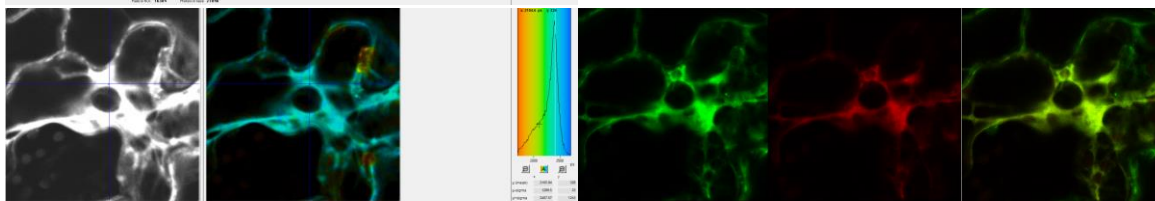

RTNLB6-GFP+RFP-RHD3  
2.34 ± 0.01

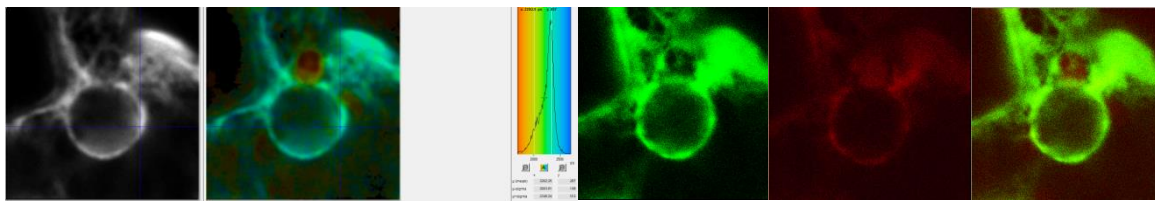

RTNLB6-GFP+RFP-DWF1  
2.32 ± 0.01

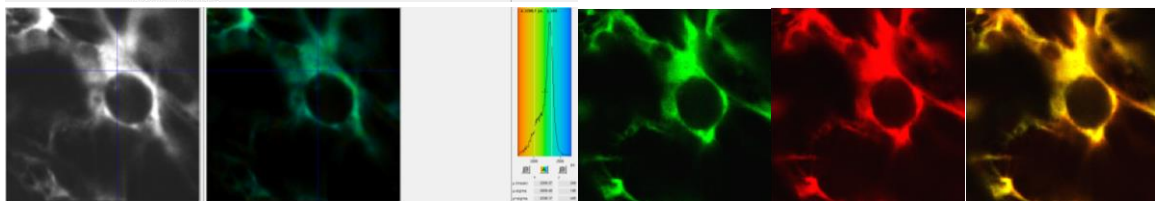

RTNLB6-GFP+RFP-DGL1  
2.37 ± 0.07

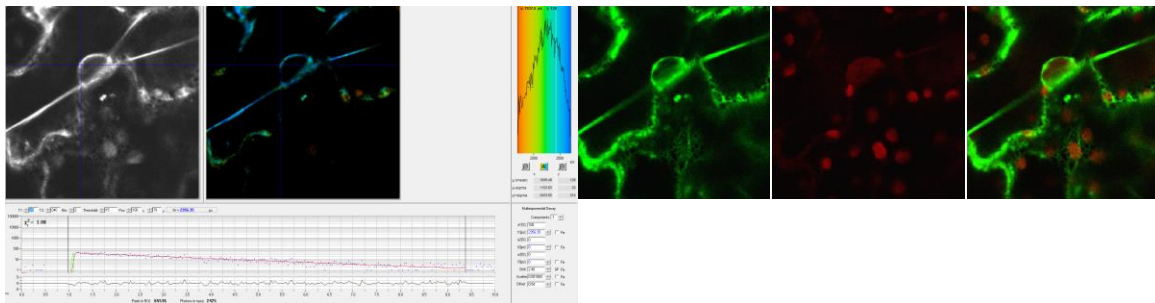

RTNLB6-GFP+RFP-Cyb5D  
2.47 ± 0.02

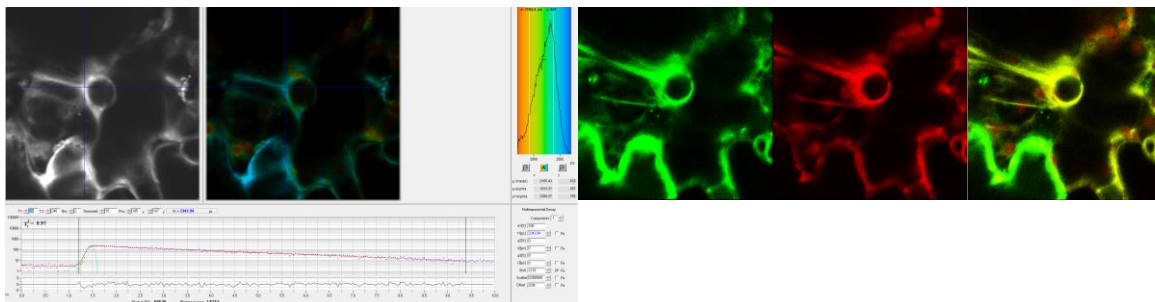

RTNLB6-GFP+RFP-SMT1  
2.36 ± 0.07

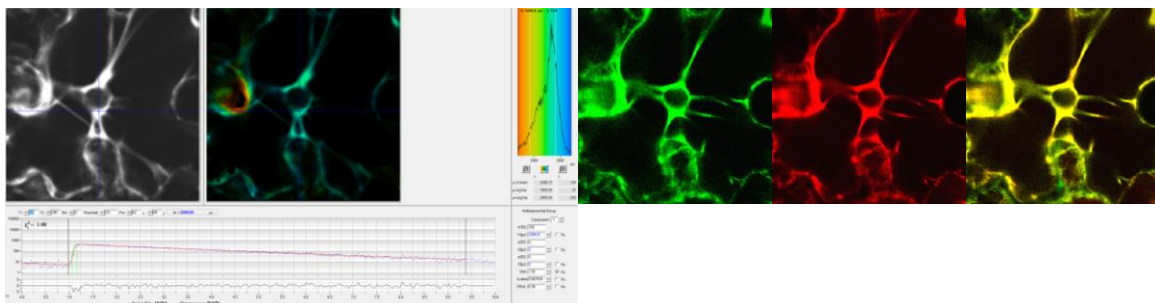

RTNLB6-GFP+RFP-SUR2  
2.34 ± 0.11

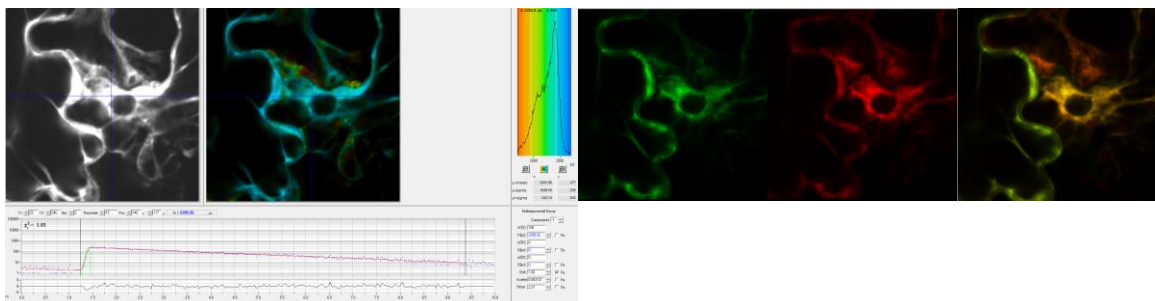

RTNLB6-GFP+RFP-PIP3  
2.35 ± 0.04

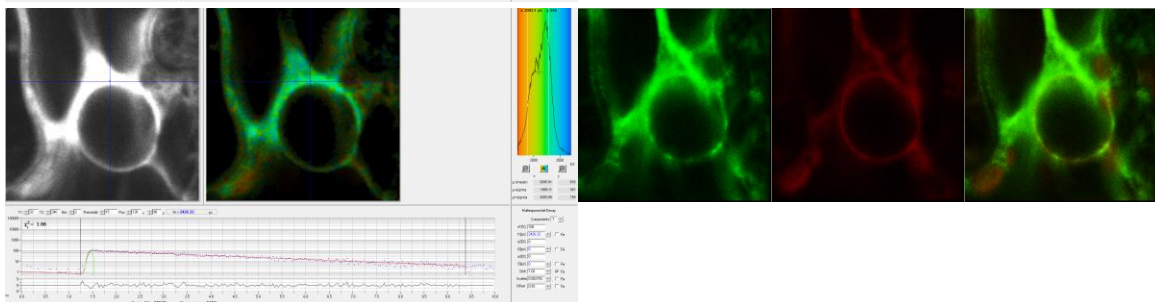



RTNLB6-GFP+RFP-REM1.3  
2.44 ± 0.05

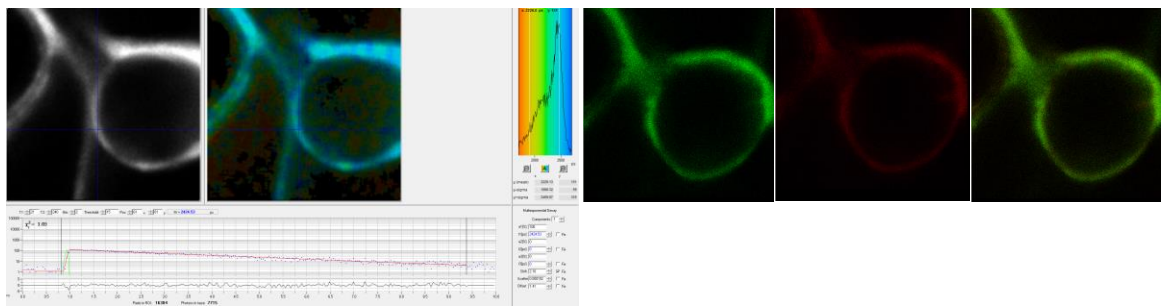

RTNLB6-GFP+RFP-FLA8  
2.67 ± 0.07

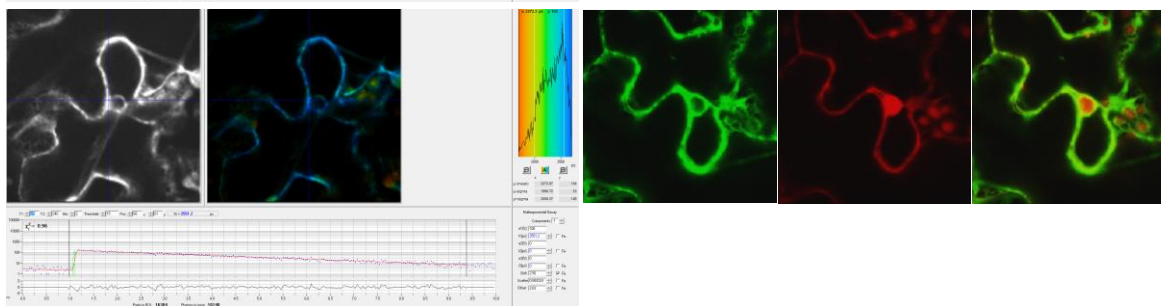

RTNLB6-GFP+RFP-Vap27  
2.33 ± 0.04

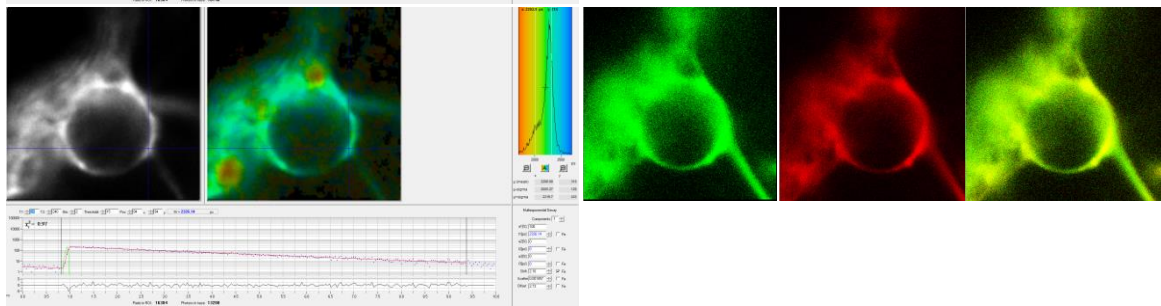

RTNLB6-GFP+RFP-ANNAT4  
2.66 ± 0.03

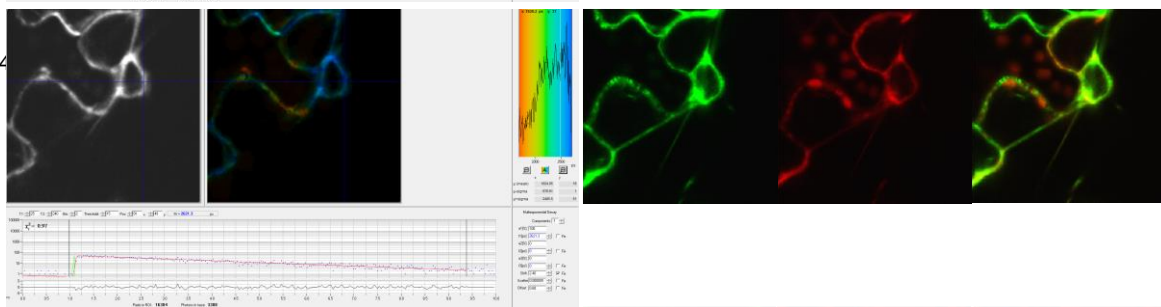

RTNLB6-GFP+RFP-TRX3  
2.62 ± 0.06

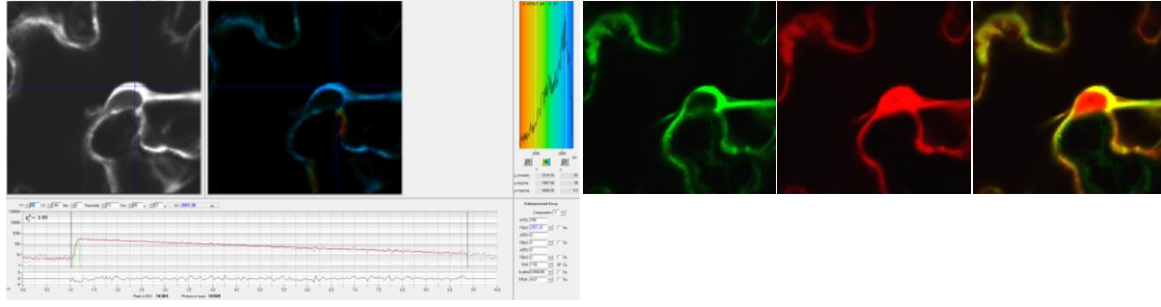

RTN6-GFP+RFP-TCP1  
2.60 ± 0.02

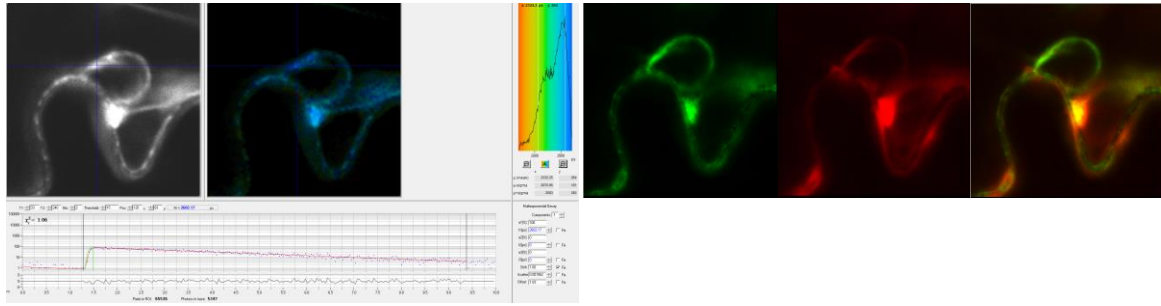

RTNLB3-GFP control  
 $2.51 \pm 0.05$

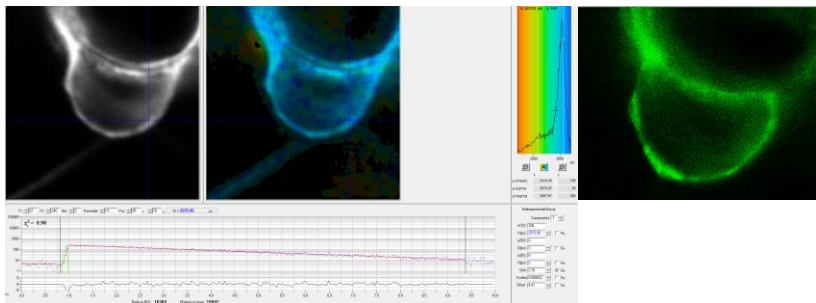

RTNLB3-GFP+RFP-RTNLB6  
 $2.31 \pm 0.01$

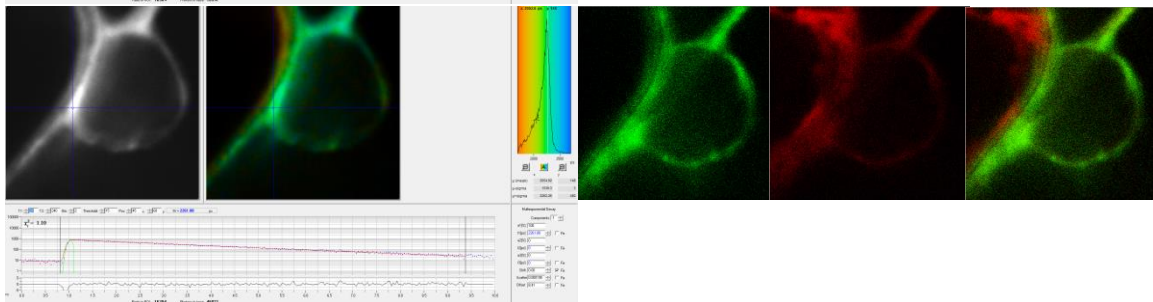

RTNLB3-GFP+SYTA-RFP  
 $2.29 \pm 0.04$

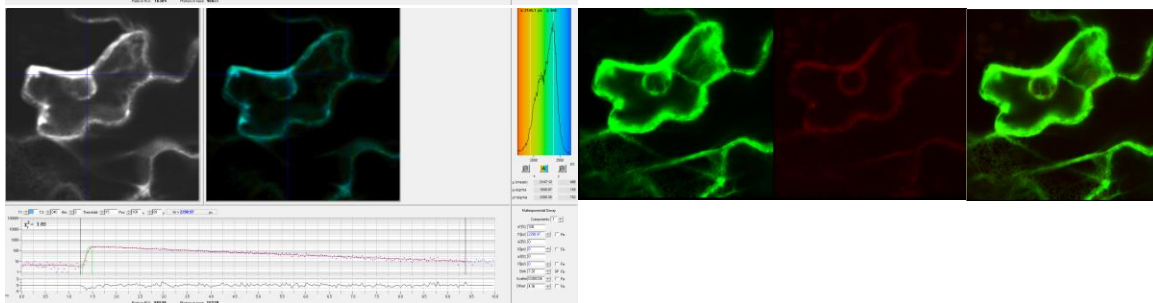

RTNLB3-GFP+RFP-RHD3  
 $2.30 \pm 0.01$

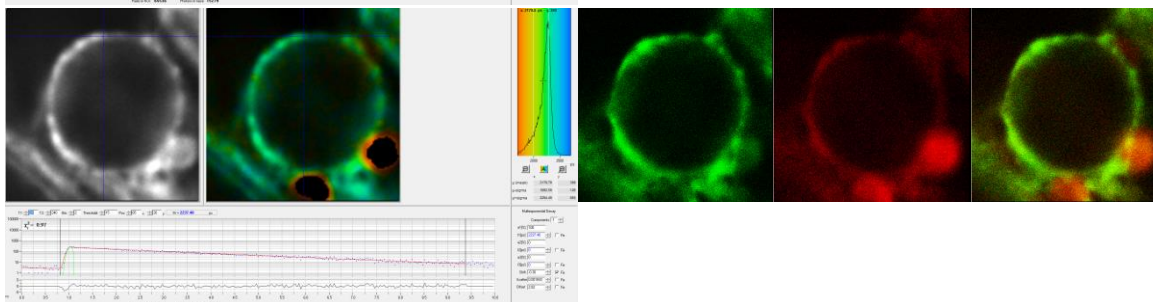

RTNLB3-GFP+RFP-DWF1  
 $2.28 \pm 0.01$

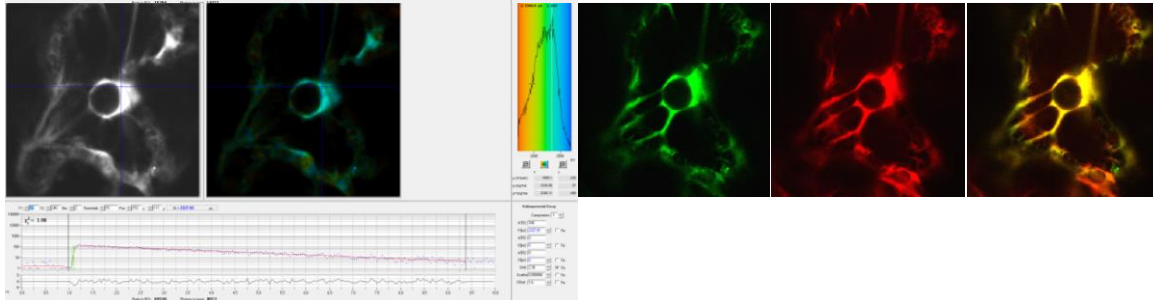

RTNLB3-GFP+RFP-DGL1  
 $2.37 \pm 0.01$

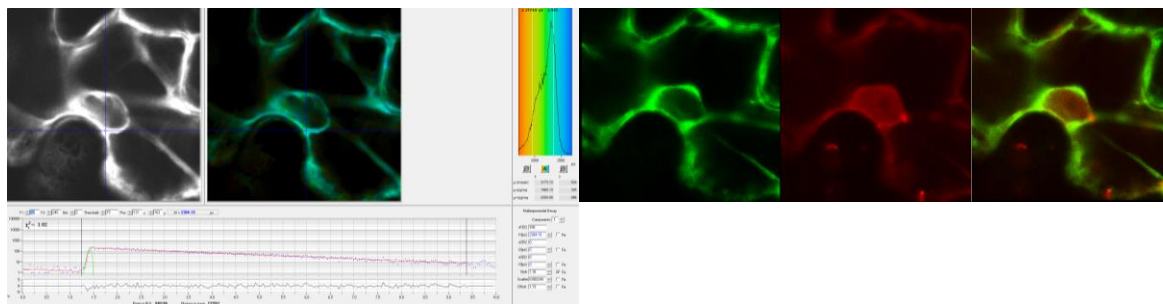

RTNLB3-GFP+RFP-Cyb5D  
 $2.30 \pm 0.01$

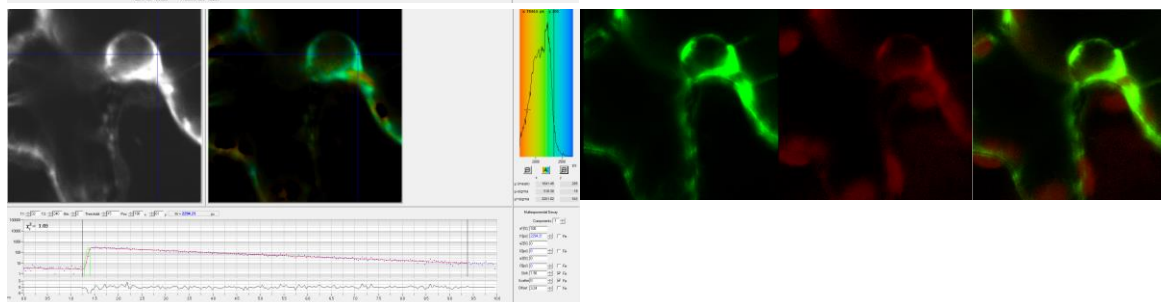

RTNLB3-GFP+RFP-SMT1  
 $2.29 \pm 0.03$

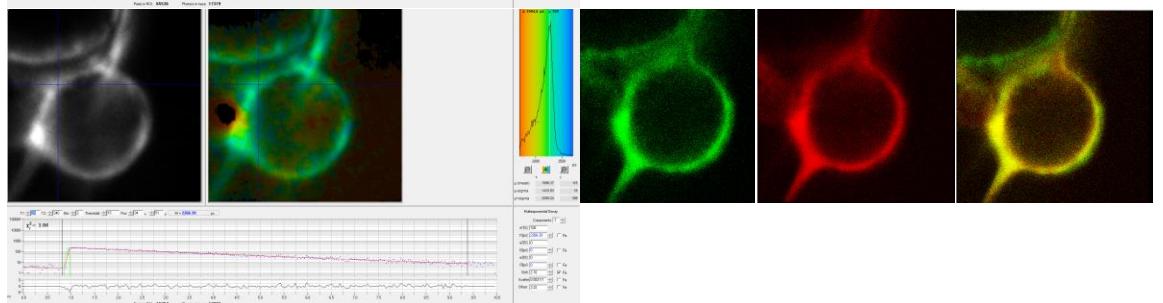

RTNLB3-GFP+RFP-SUR2  
 $2.28 \pm 0.07$

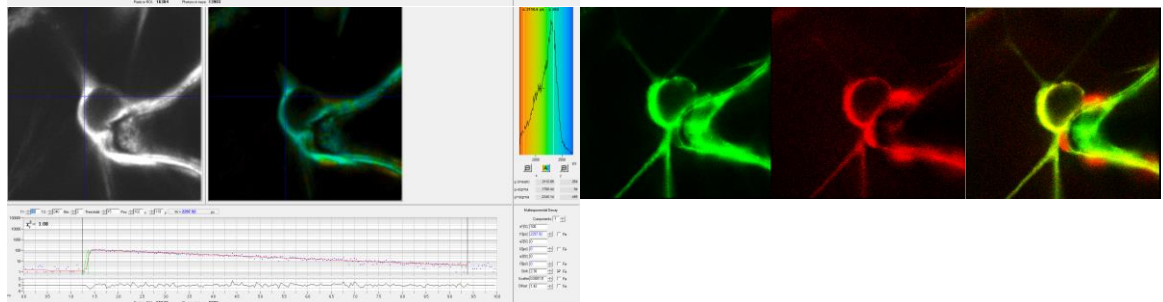

RTNLB3-GFP+RFP-PIP3  
 $2.37 \pm 0.02$

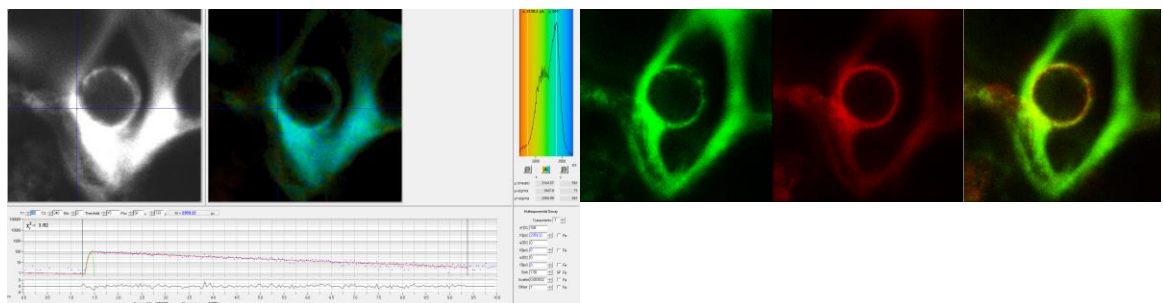



RTNLB3-GFP+RFP-REM1.3  
2.33 ± 0.02

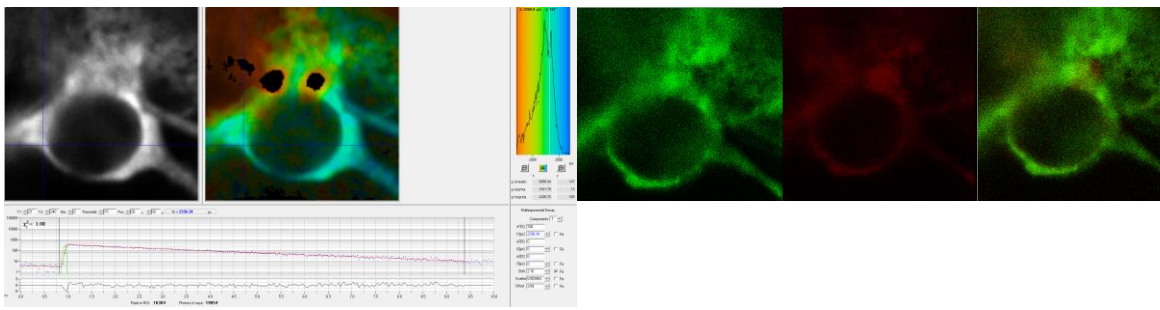

RTNLB3-GFP+RFP-FLA8  
2.53 ± 0.09

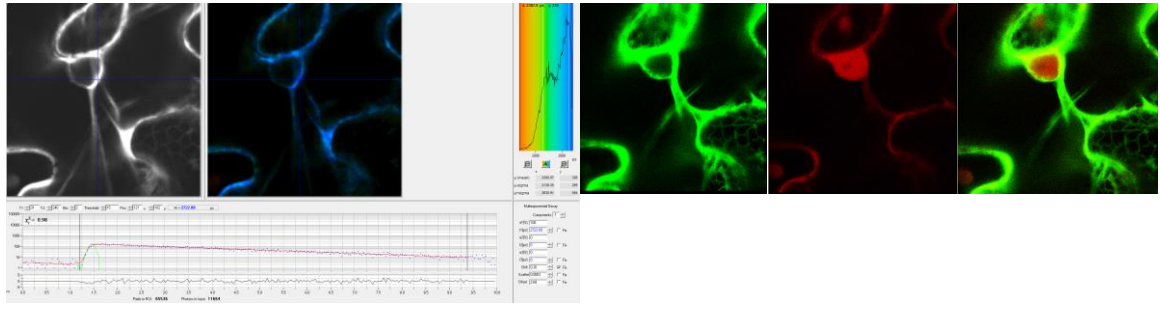

RTNLB3-GFP+RFP-Vap27  
2.33 ± 0.03

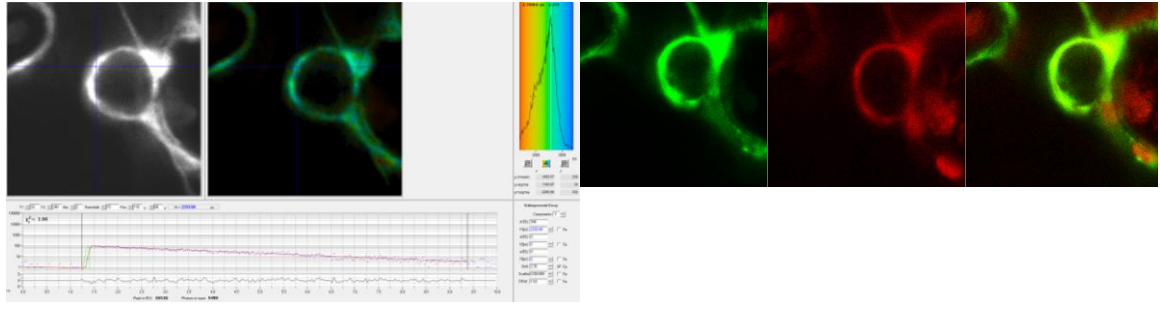

RTNLB3-GFP+RFP-ANNAT4  
2.50 ± 0.03

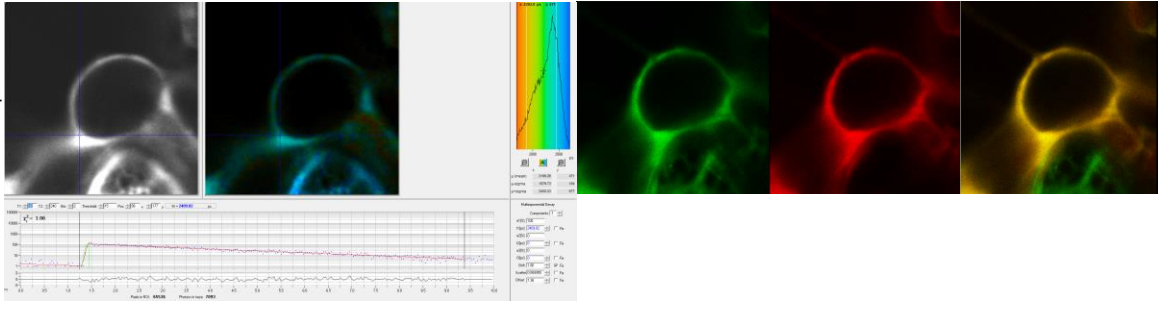

RTNLB3-GFP+RFP-TRX3  
2.48 ± 0.03

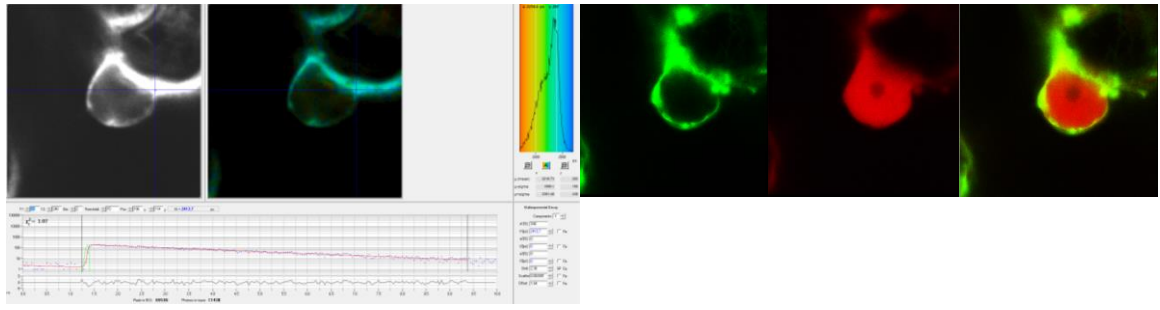

RTNLB3-GFP+RFP-TCP1  
2.32 ± 0.01

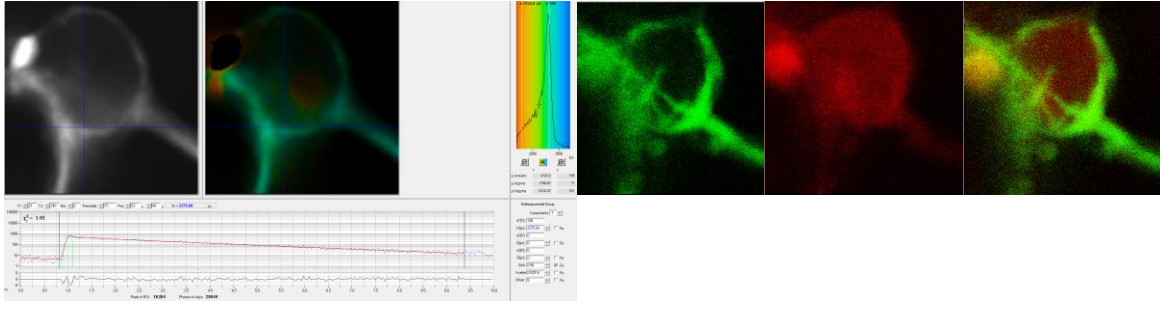

Supplement: supp_pp.15.01153_PP2015-01153R1_Supplemental_Figure_S1.pdf [file supp_pp.15.01153_PP2015-01153R1_Supplemental_Figure_S1.pdf]
